# Supplementary material for: The mechanochemical excitation of crystalline LiN3
Source: Royal Society of Chemistry journal article supplement (doi:10.1039/d2fd00112h), 2022-07-18
Supplement: d2fd00112h1.pdf [file d2fd00112h1.pdf]

Electronic Supplementary Material

## The mechanochemical excitation of crystalline LiN<sub>3</sub>

Adam A.L. Michalchuk

Federal Institute for Materials Research and Testing (BAM), Richard-Wilstaetter Str 11, 12489, Berlin, Germany

### S1 COMPRESSIBILITY AND ADIABATIC HEATING

The following section outlines the *ab initio* compressibility of the model crystal systems up to a maximum pressure of 5 GPa, alongside consideration for the effective adiabatic heating that results from this compression. Within our model, the final temperature,  $T_f$  obtained from adiabatically compressing a solid is obtained according to

$$T_f = T_0 \left( \frac{V}{V_0} \right)^{-\Gamma}$$

To calculate the approximate vibrational Gruneisen parameter, the Brillouin zone centre vibrational frequencies were calculated at increasing compression from ambient pressure to 5 GPa.

#### S1.1 Compression and heating of LiN<sub>3</sub>

**Table S1.1** | Effects of pressure on the unit cell geometry of LiN<sub>3</sub>, as obtained from PBE-D2 simulations.

| <i>p</i> /GPa | <i>a</i> = <i>b</i> | <i>c</i> | $\alpha$ | $\beta$   | $\gamma$  | <i>V</i> |
|---------------|---------------------|----------|----------|-----------|-----------|----------|
| 0             | 3.24260             | 4.95404  | 75.75320 | 104.24680 | 118.56737 | 43.83311 |
| 1             | 3.20305             | 4.87984  | 76.79810 | 103.20190 | 118.51084 | 42.41172 |
| 2             | 3.17178             | 4.83397  | 77.44244 | 102.55756 | 118.50815 | 41.34411 |
| 3             | 3.14435             | 4.79355  | 77.98540 | 102.0146  | 118.53076 | 40.39856 |
| 4             | 3.12020             | 4.75777  | 78.44599 | 101.55401 | 118.56519 | 39.56202 |
| 5             | 3.09850             | 4.72616  | 78.83972 | 101.16028 | 118.60373 | 38.81413 |
| 6             | 3.07885             | 4.69822  | 79.17800 | 100.82200 | 118.64198 | 38.14346 |
| 7             | 3.06086             | 4.67335  | 79.47376 | 100.52624 | 118.68106 | 37.53566 |
| 8             | 3.04420             | 4.65060  | 79.73658 | 100.26342 | 118.71679 | 36.97772 |
| 9             | 3.02875             | 4.63016  | 79.96801 | 100.03199 | 118.75243 | 36.46630 |
| 10            | 3.01433             | 4.61142  | 80.17716 | 99.82284  | 118.78737 | 35.99319 |

**Table S1.2** | Effect of pressure on the principal strain axes in LiN<sub>3</sub> as obtained from PBE-D2 simulations.

Note  $\chi_1 = -0.5454a + 0.5268b + 0.6519c$ ;  $\chi_2 = 0.7038a + 0.7104b + 0.0002c$ ;

$\chi_3 = -0.5686a + 0.5573b - 0.6051c$

| <i>p</i> /GPa | $\chi_1$ /% | $\chi_2$ /% | $\chi_3$ /% |
|---------------|-------------|-------------|-------------|
| 0             | 0.0         | 0.0         | 0.0         |
| 1             | -2.1764     | -1.1379     | 0.0373      |
| 2             | -3.6087     | -2.0997     | -0.0787     |

|           |          |         |         |
|-----------|----------|---------|---------|
| <b>3</b>  | -4.8457  | -2.9792 | -0.2213 |
| <b>4</b>  | -5.9195  | -3.7738 | -0.3812 |
| <b>5</b>  | -6.8606  | -4.4979 | -0.5538 |
| <b>6</b>  | -7.6900  | -5.1577 | -0.7335 |
| <b>7</b>  | -8.4298  | -5.7669 | -0.9133 |
| <b>8</b>  | -9.1027  | -6.3299 | -1.0958 |
| <b>9</b>  | -9.7096  | -6.8550 | -1.2765 |
| <b>10</b> | -10.2666 | -7.3470 | -1.4526 |

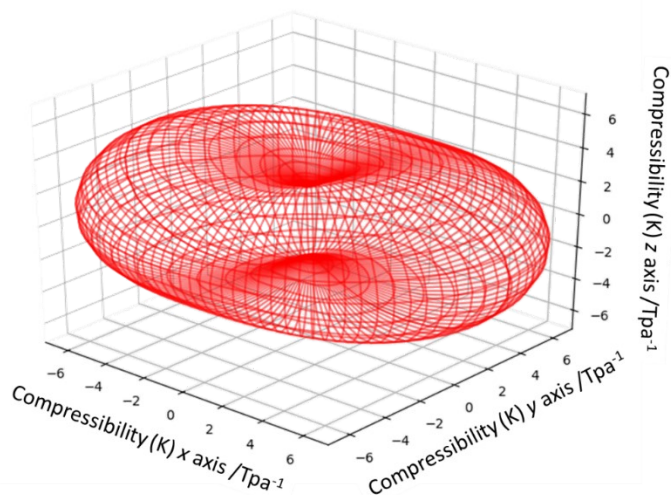

**Figure S1.1** | Compressibility indicatrix for  $\text{LiN}_3$  obtained from PBE-D2 simulation data. Figure prepared from M. J. Cliffe and A. L. Goodwin, *J Appl Crystallogr*, 2012, 45, 1321–1329.

## S2 PRESSURE DEPENDENCE OF VIBRATIONAL FREQUENCIES

**Table S2.1** | Effects of hydrostatic compression on the Brillouin zone centre vibrational frequencies of  $\text{LiN}_3$  alongside the mode-dependent Gruneisen parameters,  $\gamma$ .

|                                                 | Ambient           | $\gamma$          | 1 GPa             | 2 GPa             | 3 GPa             | 4 GPa   | 5 GPa   |
|-------------------------------------------------|-------------------|-------------------|-------------------|-------------------|-------------------|---------|---------|
| <b>Vibrational frequencies /cm<sup>-1</sup></b> |                   |                   |                   |                   |                   |         |         |
| <b>M4</b>                                       | 106.55            | 3.22346           | 116.69            | 125.03            | 133.22            | 141.27  | 148.71  |
| <b>M5</b>                                       | 154.25            | 3.47282           | 173.28            | 186.51            | 198.62            | 209.78  | 220.00  |
| <b>M6</b>                                       | 184.42            | 3.85726           | 205.96            | 224.84            | 241.92            | 257.54  | 271.73  |
| <b>M7</b>                                       | 205.90            | 2.74018           | 222.41            | 237.27            | 250.98            | 263.44  | 275.15  |
| <b>M8</b>                                       | 300.22            | 1.62556           | 313.05            | 326.89            | 338.96            | 349.84  | 360.12  |
| <b>M9</b>                                       | 624.46            | -0.09424          | 622.21            | 620.82            | 619.54            | 618.35  | 617.24  |
| <b>M10</b>                                      | 628.25            | -0.11778          | 625.54            | 623.77            | 622.14            | 620.59  | 619.17  |
| <b>M11</b>                                      | 1369.89           | 0.15099           | 1376.32           | 1381.52           | 1386.43           | 1390.98 | 1395.28 |
| <b>M12</b>                                      | 2191.48           | 0.13756           | 2200.10           | 2207.92           | 2215.28           | 2222.06 | 2228.48 |
| 1.5                                             |                   |                   |                   |                   |                   |         |         |
|                                                 | 6 GPa             | 7 GPa             | 8 GPa             | 9 GPa             | 10 GPa            |         |         |
| <b>Vibrational frequencies /cm<sup>-1</sup></b> |                   |                   |                   |                   |                   |         |         |
| <b>M4</b>                                       | 155.80 ( $B_g$ )  | 162.40 ( $B_g$ )  | 168.78 ( $B_g$ )  | 174.70 ( $B_u$ )  | 180.35 ( $B_u$ )  |         |         |
| <b>M5</b>                                       | 229.32 ( $A_g$ )  | 237.93 ( $A_g$ )  | 246.01 ( $A_g$ )  | 253.47 ( $A_g$ )  | 260.51 ( $A_g$ )  |         |         |
| <b>M6</b>                                       | 285.10 ( $A_u$ )  | 296.49 ( $B_u$ )  | 306.33 ( $B_u$ )  | 315.66 ( $B_u$ )  | 324.56 ( $B_u$ )  |         |         |
| <b>M7</b>                                       | 286.13 ( $B_u$ )  | 297.35 ( $A_u$ )  | 309.06 ( $A_u$ )  | 319.88 ( $A_u$ )  | 330.18 ( $A_u$ )  |         |         |
| <b>M8</b>                                       | 369.87 ( $B_u$ )  | 379.16 ( $B_u$ )  | 388.39 ( $B_u$ )  | 397.20 ( $B_u$ )  | 405.78 ( $B_u$ )  |         |         |
| <b>M9</b>                                       | 616.19 ( $A_u$ )  | 615.27 ( $A_u$ )  | 614.39 ( $A_u$ )  | 613.57 ( $A_u$ )  | 612.80 ( $A_u$ )  |         |         |
| <b>M10</b>                                      | 617.82 ( $B_u$ )  | 616.55 ( $B_u$ )  | 615.35 ( $B_u$ )  | 614.24 ( $B_u$ )  | 613.16 ( $B_u$ )  |         |         |
| <b>M11</b>                                      | 1399.39 ( $A_g$ ) | 1403.27 ( $A_g$ ) | 1406.98 ( $A_g$ ) | 1410.57 ( $A_g$ ) | 1414.01 ( $A_g$ ) |         |         |
| <b>M12</b>                                      | 2234.68 ( $B_u$ ) | 2240.58 ( $B_u$ ) | 2246.21 ( $B_u$ ) | 2251.75 ( $B_u$ ) | 2257.06 ( $B_u$ ) |         |         |

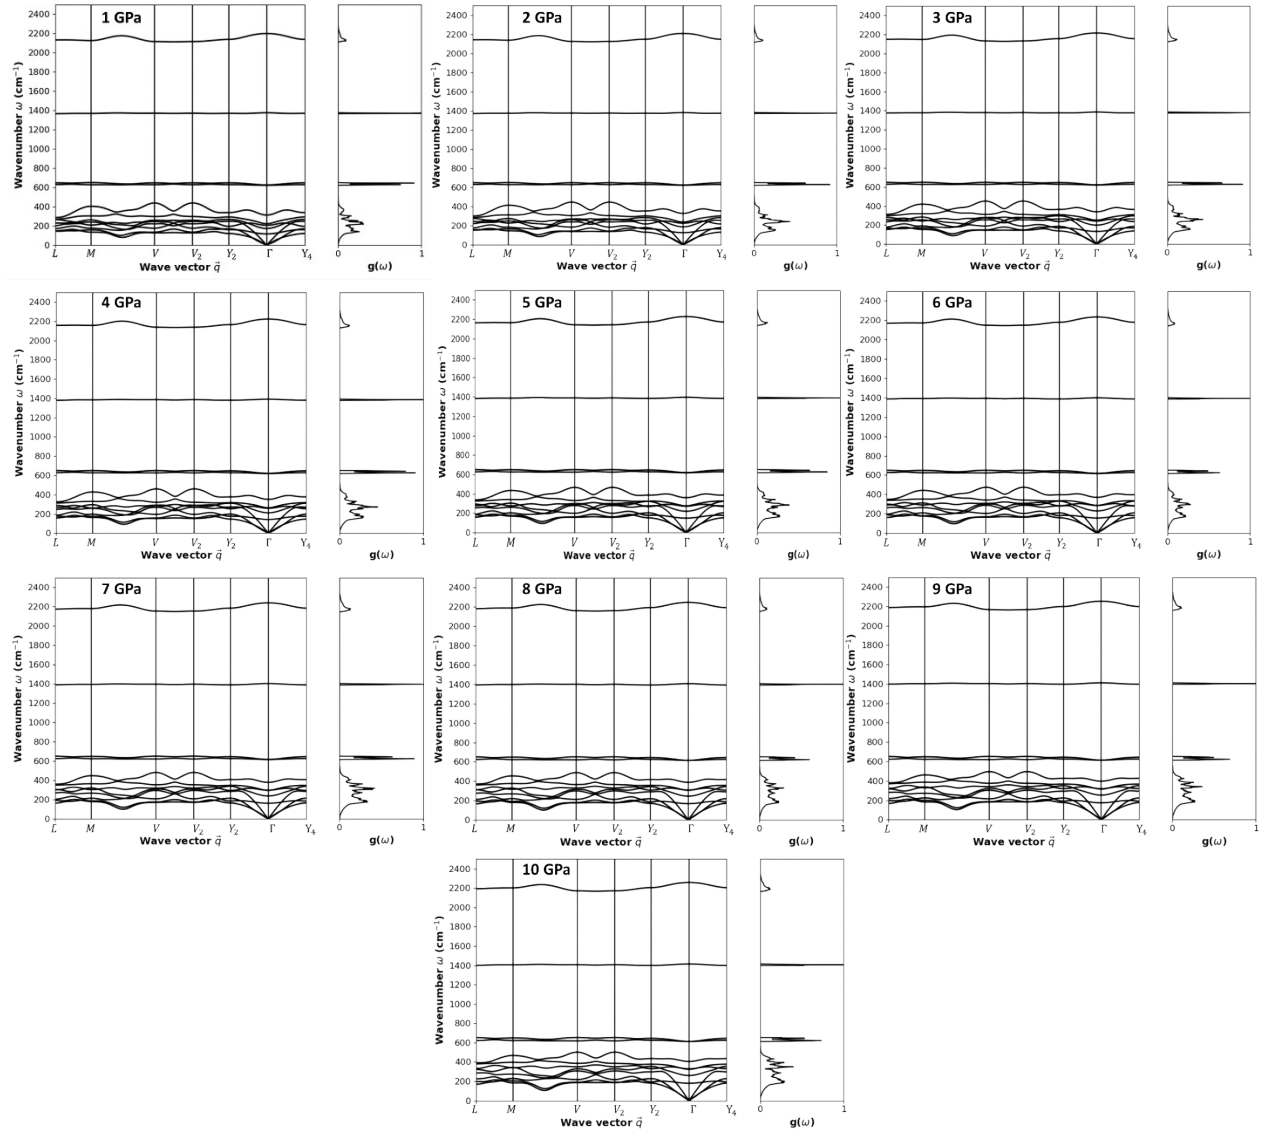

**Figure S2.1** | Phonon dispersion curves for  $\text{LiN}_3$  as a function of hydrostatic compression to 10 GPa. All dispersion curves were generated using a  $3 \times 3 \times 3$  supercell and density of states generated by integration over  $15 \times 15 \times 15$   $q$ -point mesh.

### S3 PRESSURE DEPENDENCE OF HEAT CAPACITY

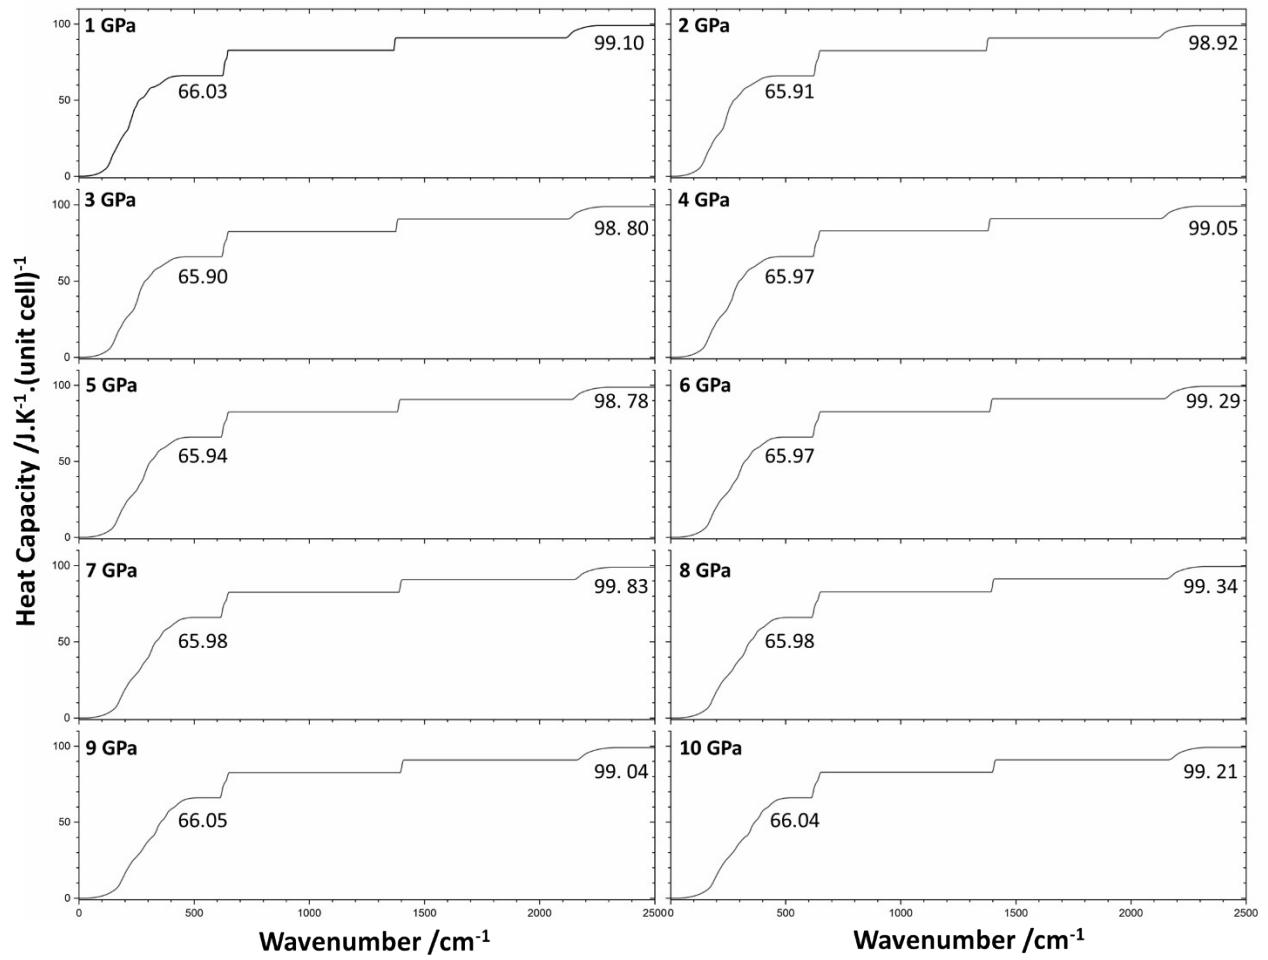

**Figure S3.1** | Effect of hydrostatic compression on the heat capacity of  $\text{LiN}_3$ . Values are given for the total and phonon heat capacities.

## S4 AB INITIO MOLECULAR DYNAMICS SIMULATIONS

Ab initio molecular dynamics simulations allow for a fully anharmonic description of the material vibrations, and are therefore not restricted to the harmonic approximation. Such calculations therefore provide a reasonable approximation for how a given system will evolve at a given set of thermodynamic conditions. In our simulations we see significant change in the geometry of the  $N_3^-$  molecule as a function of time, when at a thermally excited state. At 500 K the bending angle fluctuates around *ca.* 172°, reaching a minimum of 162° over the sampled time period. Instead, at 600 K the bond angle fluctuates around *ca.* 169°, reaching a minimum angle of *ca.* 156°. This is a 24° change in the equilibrium bond angle and is met with > 1eV change in the electronic band gap by comparison with isostructural  $NaN_3$ .

It is worth noting that such calculations are certainly a simplification of the excitation observed under dynamic mechanical loading, but do represent a rough idea for the types of distortions that can be expected when the material is excited to these quasi-temperatures.

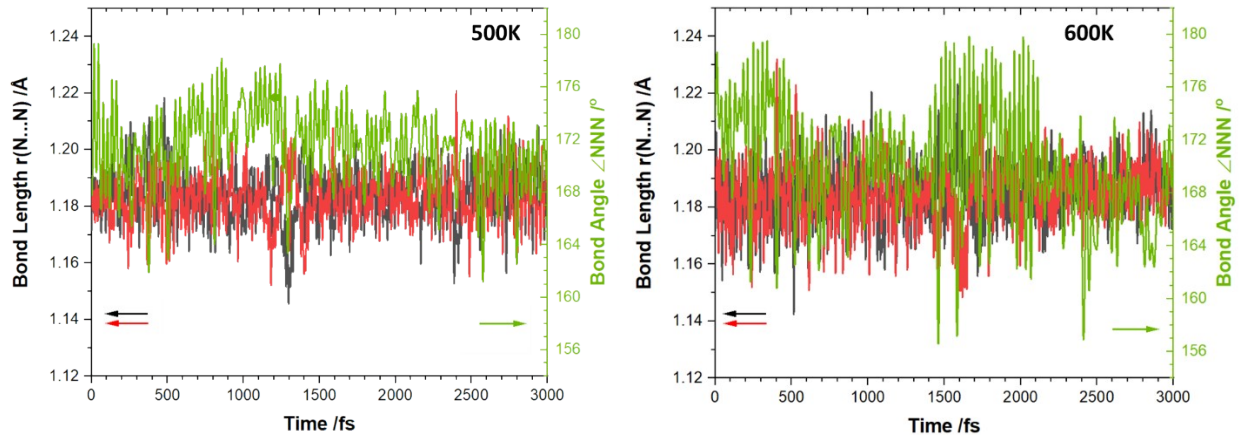

**Figure S5.1** | Evolution of  $N_3^-$  molecule geometry in the  $LiN_3$  crystal unit cell as a function of time at 500 K and 600 K. The angle bend is given in green, and the two N-N bonds are denoted in black and red.

## S5 ANISOTROPIC COMPRESSION

The above models make the significant assumption of hydrostatic compression. To gain closer access to the mechanical regime accessed during mechanochemical processing, we consider here the effects of anisotropic compression, restricting discussion to compressions along the direct crystal lattice vectors, and hence omitting any discussion of shear. Although such considerations are likely more representative of mechanochemical conditions, omission of shear is a significant assumption, and its inclusion will be considered in a dedicated follow up investigation.

### S5.1 Anisotropic Compression of $a$ axis.

To explore uniaxial compression of the  $a$  axis, the  $a$  axis was systematically compressed while the remaining unit cell parameters and ion positions were allowed to relax, Table S5.1 To a maximum strain of *ca.* 7% on the  $a$  axis, the overall volume of the unit cell reduces by *ca.* 4.8% with slight expansion of the crystallographic  $b$  axis being observed. With compression of the  $a$  axis, three of the external modes harden, whereas two soften, Table S5.2. This reflects a significant difference in the dynamical response of  $\text{LiN}_3$  under hydrostatic and non-hydrostatic loading. Most notable is M7 (comprising a translational motion of both Li and  $\text{N}_3$  species), which hardens with a mode Grüneisen parameter of  $> 8$ , Table S5.3, although the mode averaged Grüneisen parameter reaches only 1.06, notably smaller than achieved for hydrostatic compression owing to the marked softening of vibrational bands under uniaxial compression.

**Table S5.1** Effects of anisotropic compression of  $a$  axis on the lattice parameters.

| $a/a_0$ /% | <b>a</b> | <b>b</b> | <b>c</b> | $\alpha$ | $\beta$ | $\gamma$ | <b>Vol</b> |
|------------|----------|----------|----------|----------|---------|----------|------------|
| 1          | 3.210    | 3.245    | 4.932    | 76.419   | 104.142 | 118.342  | 43.429     |
| 5          | 3.080    | 3.255    | 4.942    | 76.456   | 103.125 | 117.119  | 42.464     |
| 7          | 3.016    | 3.268    | 4.920    | 77.673   | 103.869 | 116.691  | 41.740     |

**Table S5.2** Effect of anisotropic compression of the  $a$  axis on the  $\Gamma$  point vibrations of  $\text{LiN}_3$

| 1% Compress.            |                         | 5% Compress.            |                         |                         |                         | 7% Compress.            |  |
|-------------------------|-------------------------|-------------------------|-------------------------|-------------------------|-------------------------|-------------------------|--|
| $\nu$ /cm <sup>-1</sup> |  |
| <b>M4</b> 109.85        | <b>M9</b> 622.73        | <b>M4</b> 110.93        | <b>M9</b> 623.07        | <b>M4</b> 120.46        | <b>M9</b> 615.51        |                         |  |
| <b>M5</b> 160.57        | <b>M10</b> 627.66       | <b>M5</b> 153.03        | <b>M10</b> 624.82       | <b>M5</b> 127.19        | <b>M10</b> 627.43       |                         |  |
| <b>M6</b> 179.28        | <b>M11</b> 1371.92      | <b>M6</b> 166.96        | <b>M11</b> 1377.15      | <b>M6</b> 173.50        | <b>M11</b> 1384.21      |                         |  |
| <b>M7</b> 214.37        | <b>M12</b> 2193.85      | <b>M7</b> 252.97        | <b>M12</b> 2206.05      | <b>M7</b> 287.02        | <b>M12</b> 2213.28      |                         |  |
| <b>M8</b> 302.13        |                         | <b>M8</b> 324.81        |                         | <b>M8</b> 348.34        |                         |                         |  |

**Table S5.3** Mode Grüneisen parameters ( $\gamma$ ) for uniaxial compression of the  $a$  axis to a strain of 7%.

|           | $\gamma$ |           | $\gamma$ |            | $\gamma$ |
|-----------|----------|-----------|----------|------------|----------|
| <b>M4</b> | 2.73     | <b>M7</b> | 8.25     | <b>M10</b> | -0.03    |
| <b>M5</b> | -3.67    | <b>M8</b> | 3.36     | <b>M11</b> | 0.22     |
| <b>M6</b> | -1.24    | <b>M9</b> | -0.30    | <b>M12</b> | 0.21     |

The full phonon dispersion curves, Figure S5.1 exhibit a significant hardening of the lattice modes across the Brillouin zone

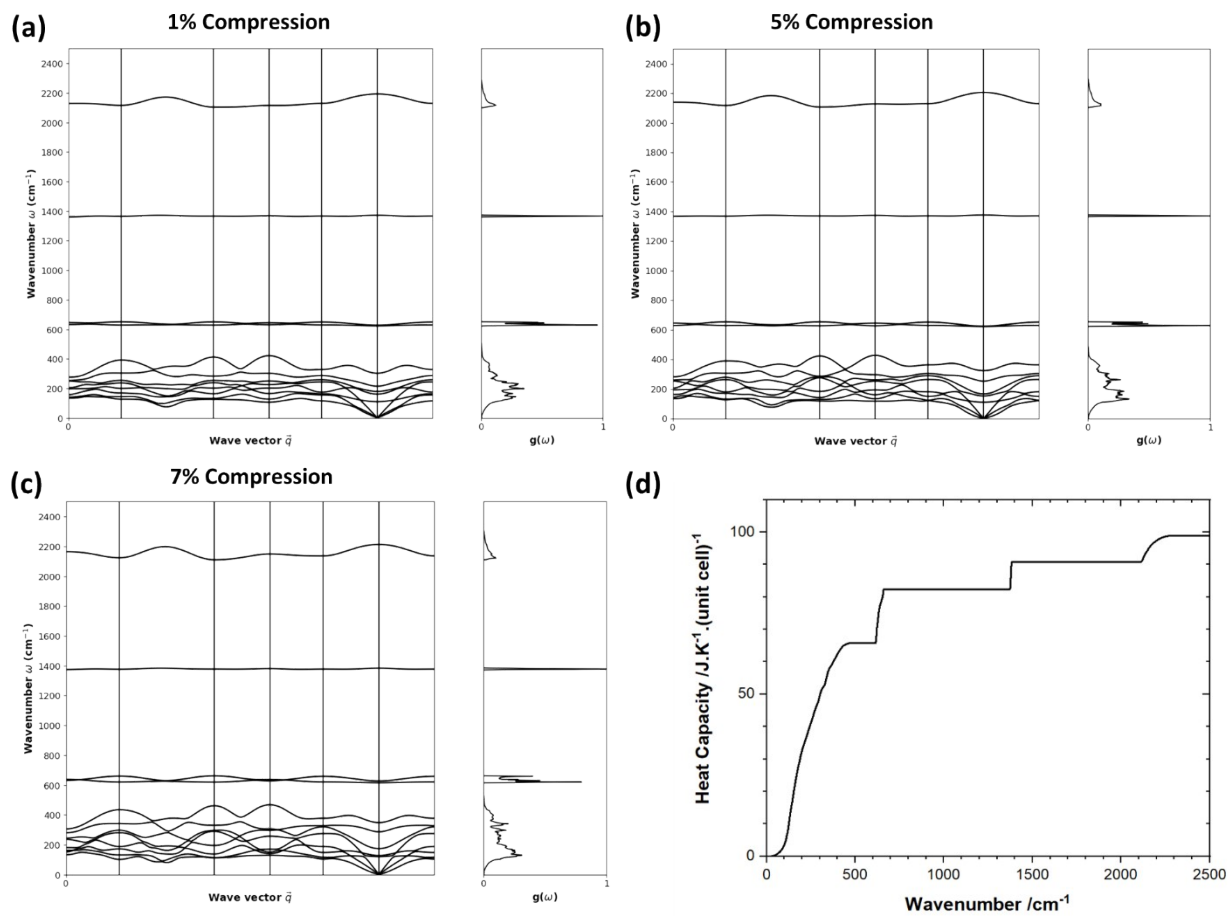

**Figure S5.1** Effects of uniaxial compression of the  $a$  axis on the phonon dispersion of  $\text{LiN}_3$  at (a) 1%, (b) 5%, and (c) 7% compression. (d) The vibrational heat capacity for  $\text{LiN}_3$  at 7% compression of the  $a$  axis.



## S5.2 Anisotropic Compression of *b* axis.

To explore uniaxial compression of the *b* axis, the *b* axis was systematically compressed while the remaining unit cell parameters and ion positions were allowed to relax, Table S5.4 To a maximum strain of *ca.* 7% on the *b* axis, the overall volume of the unit cell reduces by *ca.* 4.2% with slight expansion of the crystallographic *c* axis being observed. With compression of the *b* axis, three of the external modes harden, whereas two soften (M5 and M6), Table S5.5. these are the same modes that soften with the *a* axis is compressed (see Table S5.3). Consistent with compression of the *a* axis, the M7 mode has the largest absolute Grüneisen parameter, although somewhat smaller when the *b* axis is compressed, Table S5.6. The mode averaged Grüneisen parameter for uniaxial compression of the *b* axis is 0.75, notably smaller than achieved uniaxial compression of the *a* axis, suggesting that the mechanochemical reactivity may differ depending which face is exposed to the mechanical action.

Hardening of vibrations is observed across the Brillouin zone with uniaxial compression of the *c* axis, Figure S5.2.

**Table S5.4** Effects of anisotropic compression of *b* axis on the lattice parameters.

| $b/b_0$ /% | a     | b     | c     | $\alpha$ | $\beta$ | $\gamma$ | Vol    |
|------------|-------|-------|-------|----------|---------|----------|--------|
| 1          | 3.245 | 3.210 | 4.934 | 75.783   | 103.549 | 118.351  | 43.433 |
| 5          | 3.256 | 3.080 | 4.944 | 76.815   | 103.582 | 117.191  | 42.453 |
| 7          | 3.269 | 3.016 | 4.961 | 76.923   | 103.528 | 116.889  | 41.995 |

**Table S5.5** Effect of anisotropic compression of the *b* axis on the  $\Gamma$  point vibrations of  $\text{LiN}_3$

| 1% Compress.            |                         | 5% Compress.            |                         |                         |                         | 7% Compress.            |  |
|-------------------------|-------------------------|-------------------------|-------------------------|-------------------------|-------------------------|-------------------------|--|
| $\nu$ /cm <sup>-1</sup> |  |
| <b>M4</b> 110.05        | <b>M9</b> 622.64        | <b>M4</b> 110.51        | <b>M9</b> 623.05        | <b>M4</b> 111.13        | <b>M9</b> 622.90        |                         |  |
| <b>M5</b> 160.35        | <b>M10</b> 627.81       | <b>M5</b> 154.18        | <b>M10</b> 624.77       | <b>M5</b> 139.89        | <b>M10</b> 623.56       |                         |  |
| <b>M6</b> 179.19        | <b>M11</b> 1371.88      | <b>M6</b> 166.26        | <b>M11</b> 1377.39      | <b>M6</b> 168.28        | <b>M11</b> 1379.85      |                         |  |
| <b>M7</b> 214.47        | <b>M12</b> 2193.82      | <b>M7</b> 252.50        | <b>M12</b> 2206.60      | <b>M7</b> 267.71        | <b>M12</b> 2212.93      |                         |  |
| <b>M8</b> 301.94        |                         | <b>M8</b> 324.61        |                         | <b>M8</b> 334.82        |                         |                         |  |

**Table S5.6** Mode Grüneisen parameters ( $\gamma$ ) for uniaxial compression of the *b* axis to a strain of 7%.

| $\gamma$        | $\gamma$        | $\gamma$         |
|-----------------|-----------------|------------------|
| <b>M4</b> 1.03  | <b>M7</b> 7.16  | <b>M10</b> -0.18 |
| <b>M5</b> -2.22 | <b>M8</b> 2.75  | <b>M11</b> 0.17  |
| <b>M6</b> -2.09 | <b>M9</b> -0.06 | <b>M12</b> 0.23  |

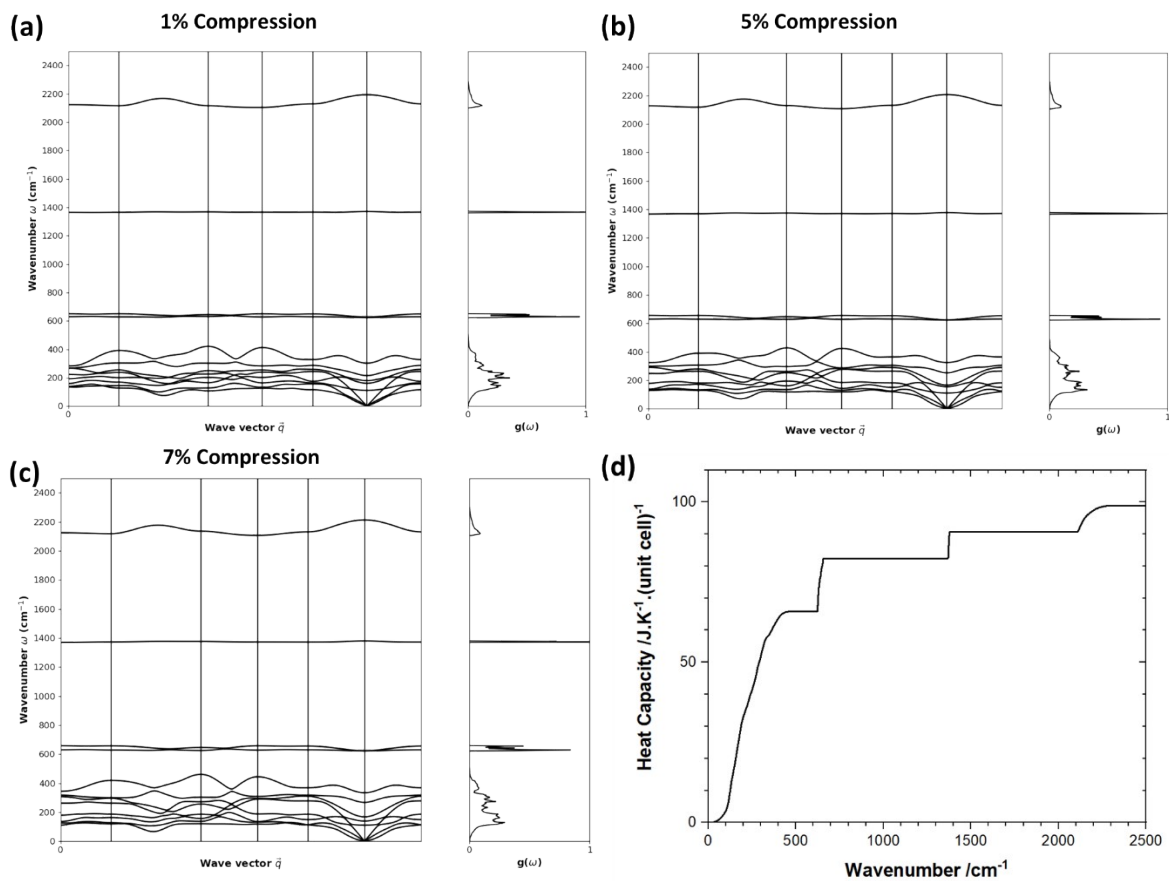

**Figure S5.2** Effects of uniaxial compression of the  $b$  axis on the phonon dispersion of  $\text{LiN}_3$  at (a) 1%, (b) 5%, and (c) 7% compression. (d) The vibrational heat capacity for  $\text{LiN}_3$  at 7% compression of the  $b$  axis.

### S5.3 Anisotropic Compression of *c* axis.

To explore uniaxial compression of the *c* axis, the *c* axis was systematically compressed while the remaining unit cell parameters and ion positions were allowed to relax, Table S5.4 To a maximum strain of *ca.* 7% on the *b* axis, the overall volume of the unit cell reduces by *ca.* 4.0%. Unlike compression of the *a* and *b* axes, compression of the *c* axis leads to hardening of *all* five external modes, Table S5.8, with negligible softening of the internal modes. Correspondingly, the average Grüneisen parameter for compression of the *c* axis, Table S5.9, is 2.59. This is significantly larger than compression along either the *a* or *b* axes, and is even larger than the average Grüneisen parameter obtained under hydrostatic compression (see Table S2.1). This provides strong evidence that mechanochemical reactivity of LiN<sub>3</sub> is directionally dependent, a phenomenon that will be explored in greater detail in future work.

Hardening of vibrations is observed across the Brillouin zone with uniaxial compression of the *c* axis, Figure S5.3.

**Table S5.7** Effects of anisotropic compression of *c* axis on the lattice parameters.

| <i>c/c</i> <sub>0</sub> /% | <i>a</i> | <i>b</i> | <i>c</i> | $\alpha$ | $\beta$ | $\gamma$ | Vol    |
|----------------------------|----------|----------|----------|----------|---------|----------|--------|
| 1                          | 3.239    | 3.239    | 4.905    | 76.443   | 103.557 | 118.284  | 43.596 |
| 5                          | 3.243    | 3.243    | 4.706    | 78.800   | 101.200 | 117.533  | 42.736 |
| 7                          | 3.235    | 3.235    | 4.607    | 79.701   | 100.299 | 116.801  | 42.069 |

**Table S5.8** Effect of anisotropic compression of the *c* axis on the  $\Gamma$  point vibrations of LiN<sub>3</sub>

| 1% Compress.            |                         | 5% Compress.            |                         | 7% Compress.            |                         |
|-------------------------|-------------------------|-------------------------|-------------------------|-------------------------|-------------------------|
| $\nu$ /cm <sup>-1</sup> |
| <b>M4</b> 110.26        | <b>M9</b> 623.62        | <b>M4</b> 122.24        | <b>M9</b> 619.48        | <b>M4</b> 139.64        | <b>M9</b> 618.96        |
| <b>M5</b> 164.64        | <b>M10</b> 626.78       | <b>M5</b> 199.23        | <b>M10</b> 620.51       | <b>M5</b> 211.81        | <b>M10</b> 619.15       |
| <b>M6</b> 188.41        | <b>M11</b> 1370.89      | <b>M6</b> 206.59        | <b>M11</b> 1377.09      | <b>M6</b> 217.14        | <b>M11</b> 1377.30      |
| <b>M7</b> 207.63        | <b>M12</b> 2190.42      | <b>M7</b> 212.95        | <b>M12</b> 2189.89      | <b>M7</b> 221.13        | <b>M12</b> 2181.19      |
| <b>M8</b> 304.44        |                         | <b>M8</b> 304.06        |                         | <b>M8</b> 319.67        |                         |

**Table S5.9** Mode Grüneisen parameters ( $\gamma$ ) for uniaxial compression of the *c* axis to a strain of 7%.

| $\gamma$       | $\gamma$        | $\gamma$         |
|----------------|-----------------|------------------|
| <b>M4</b> 7.41 | <b>M7</b> 1.76  | <b>M10</b> -0.35 |
| <b>M5</b> 8.90 | <b>M8</b> 1.54  | <b>M11</b> 0.13  |
| <b>M6</b> 4.23 | <b>M9</b> -0.21 | <b>M12</b> -0.11 |

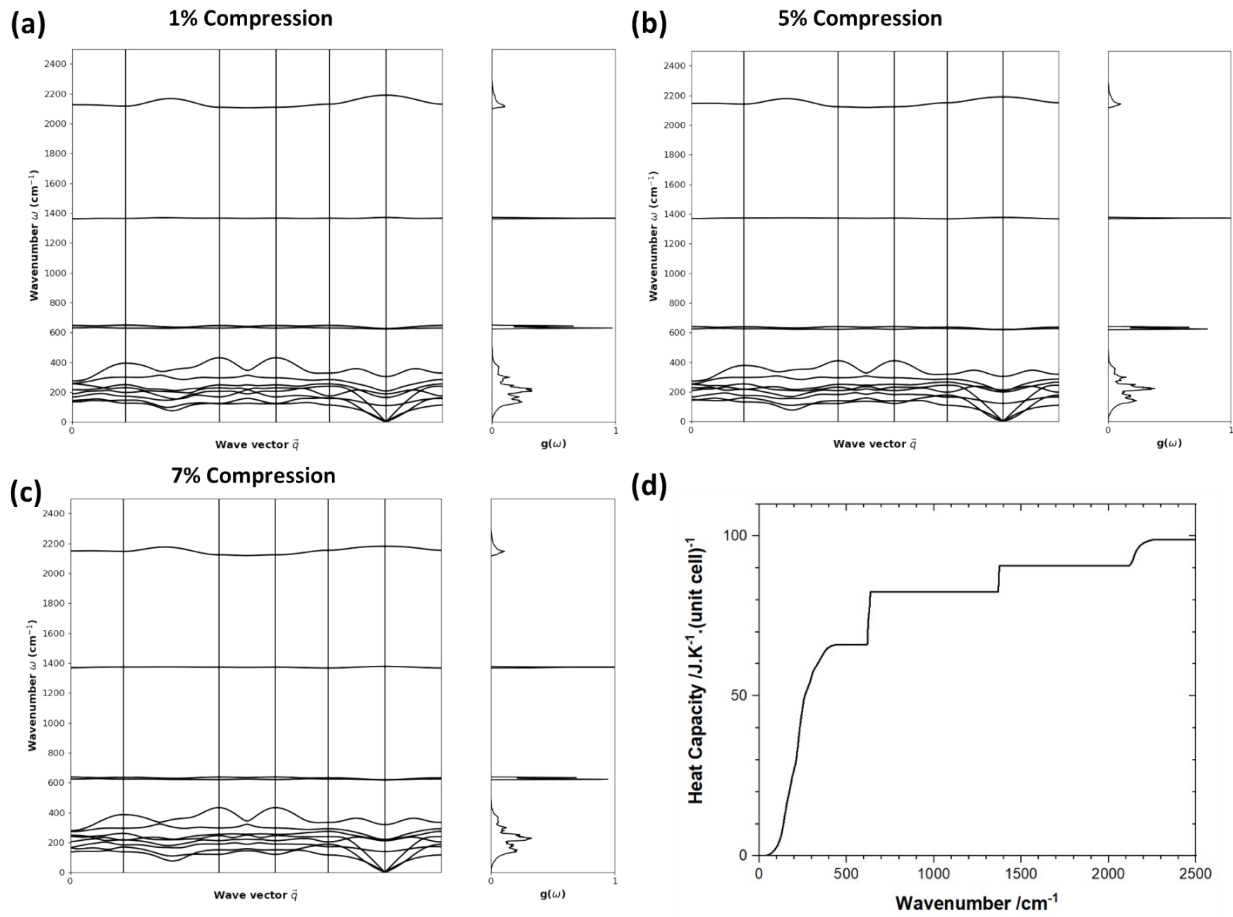

**Figure S5.3** Effects of uniaxial compression of the  $c$  axis on the phonon dispersion of  $\text{LiN}_3$  at (a) 1%, (b) 5%, and (c) 7% compression. (d) The vibrational heat capacity for  $\text{LiN}_3$  at 7% compression of the  $c$  axis.
